# Supplementary material for: Novel Molecular Characterization of Colorectal Primary Tumors Based on miRNAs
Source: PubMed Central journal article supplement (PMC6468580; doi:10.3390/cancers11030346), 2019-03-11

# Supplementary Materials: Novel Molecular Characterization of Colorectal Primary Tumors Based on miRNAs

Elisa Conde Moreno, Alejandro Pascual, Daniel Prieto-Cuadra, Val F. Lanza, Javier Molina-Cerrillo, Miren Edurne Ramos-Muñoz, Esperanza Macarena Rodríguez-Serrano, José Luis Soto, Alfredo Carrato, María Laura García-Bermejo and Carmen Guillen-Ponce

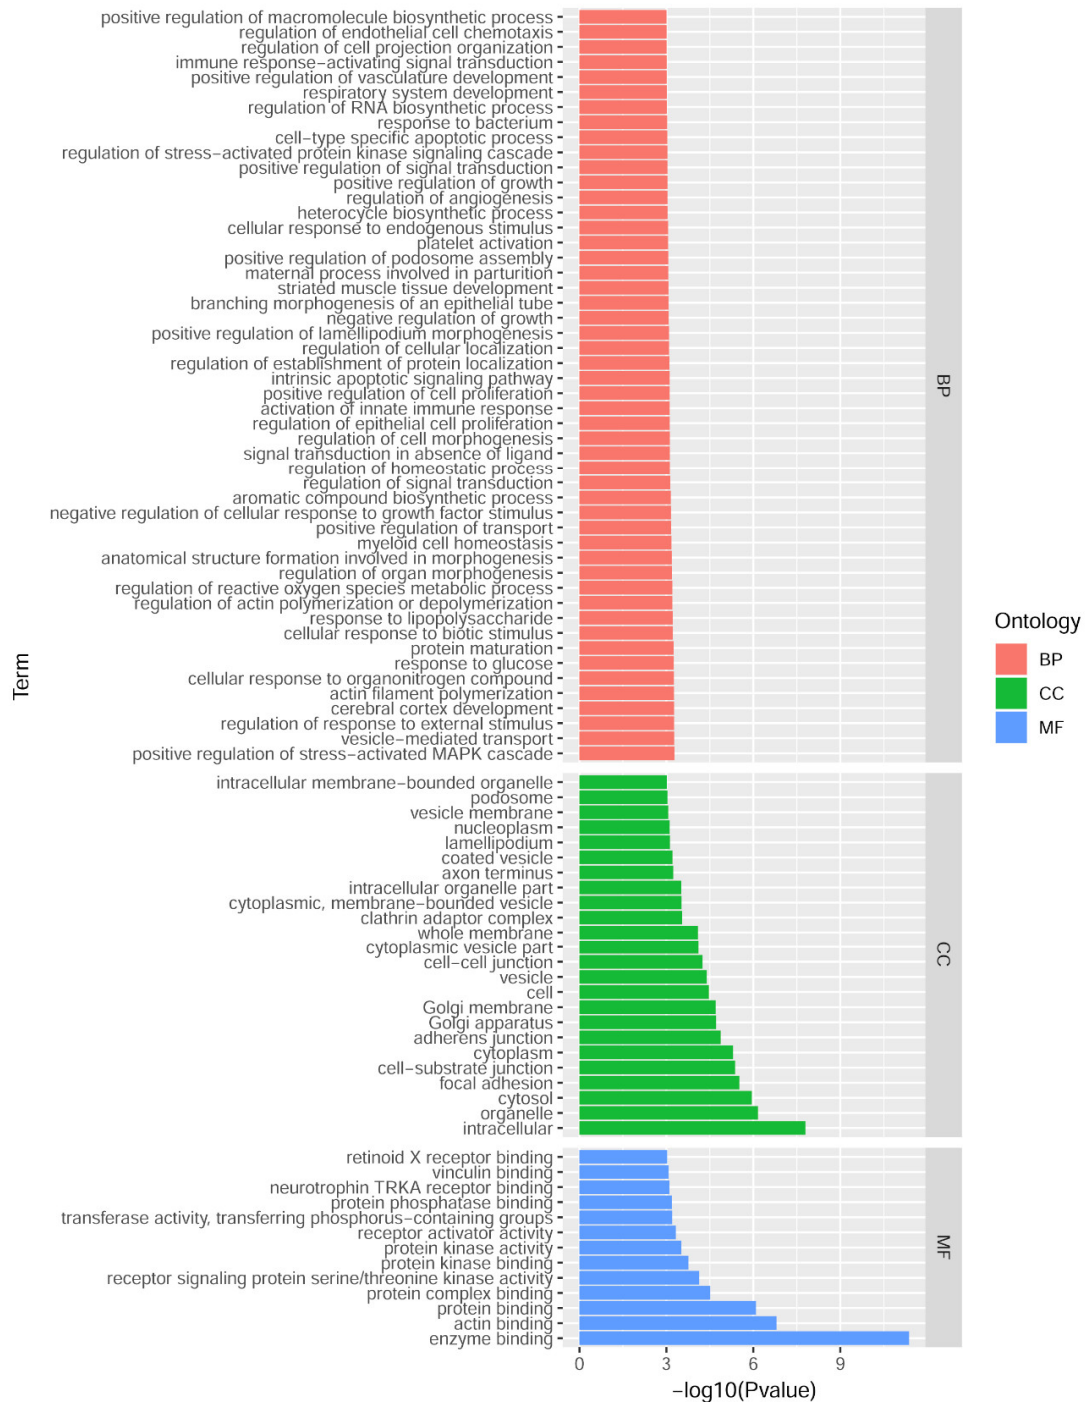

**Figure S1.** Functional enrichment analysis of miRNAs associated with age and Lynch syndrome. Bar plot of statistically significant GO terms. The three GO categories are divided: BP (Biological process) in red, CC (Cellular component) in green, MF (Molecular function) in blue.

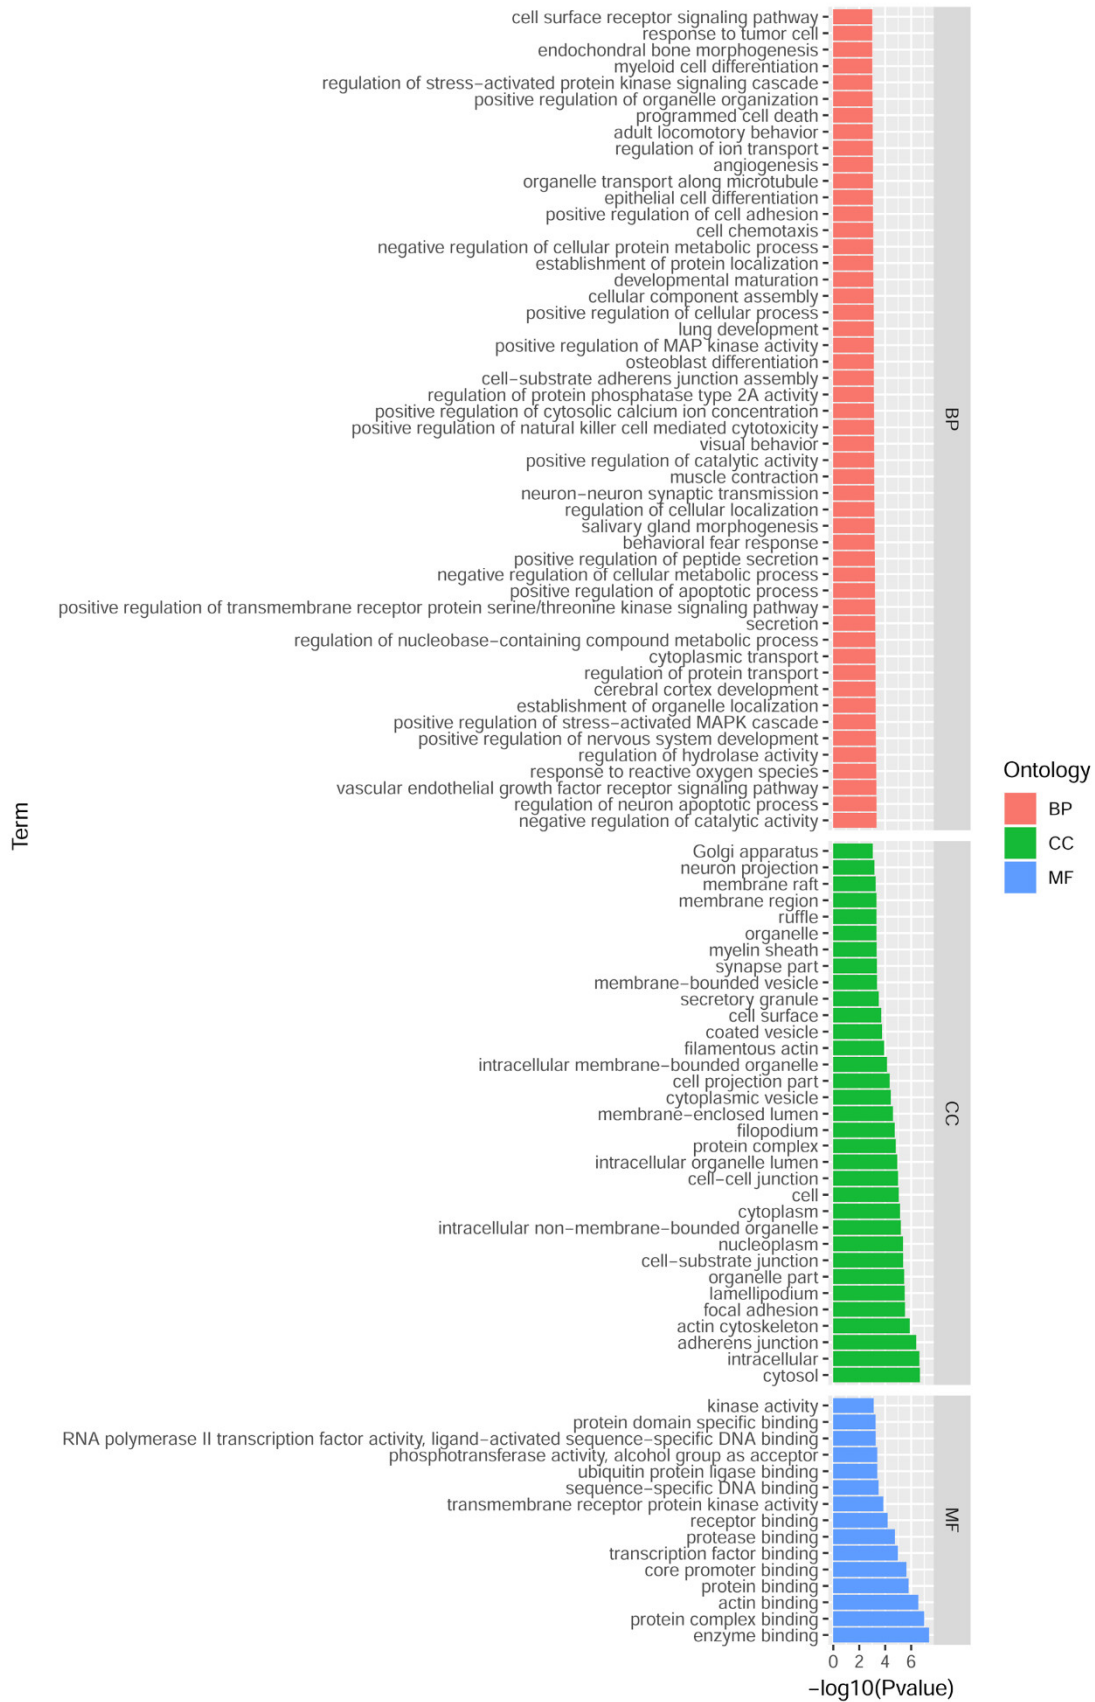

**Figure S2.** Functional enrichment analysis of miRNAs associated with biopsy histopathological features. Bar plot of statistically significant GO terms. The three GO categories are divided: BP (Biological process) in red, CC (Cellular component) in green, MF (Molecular function) in blue.

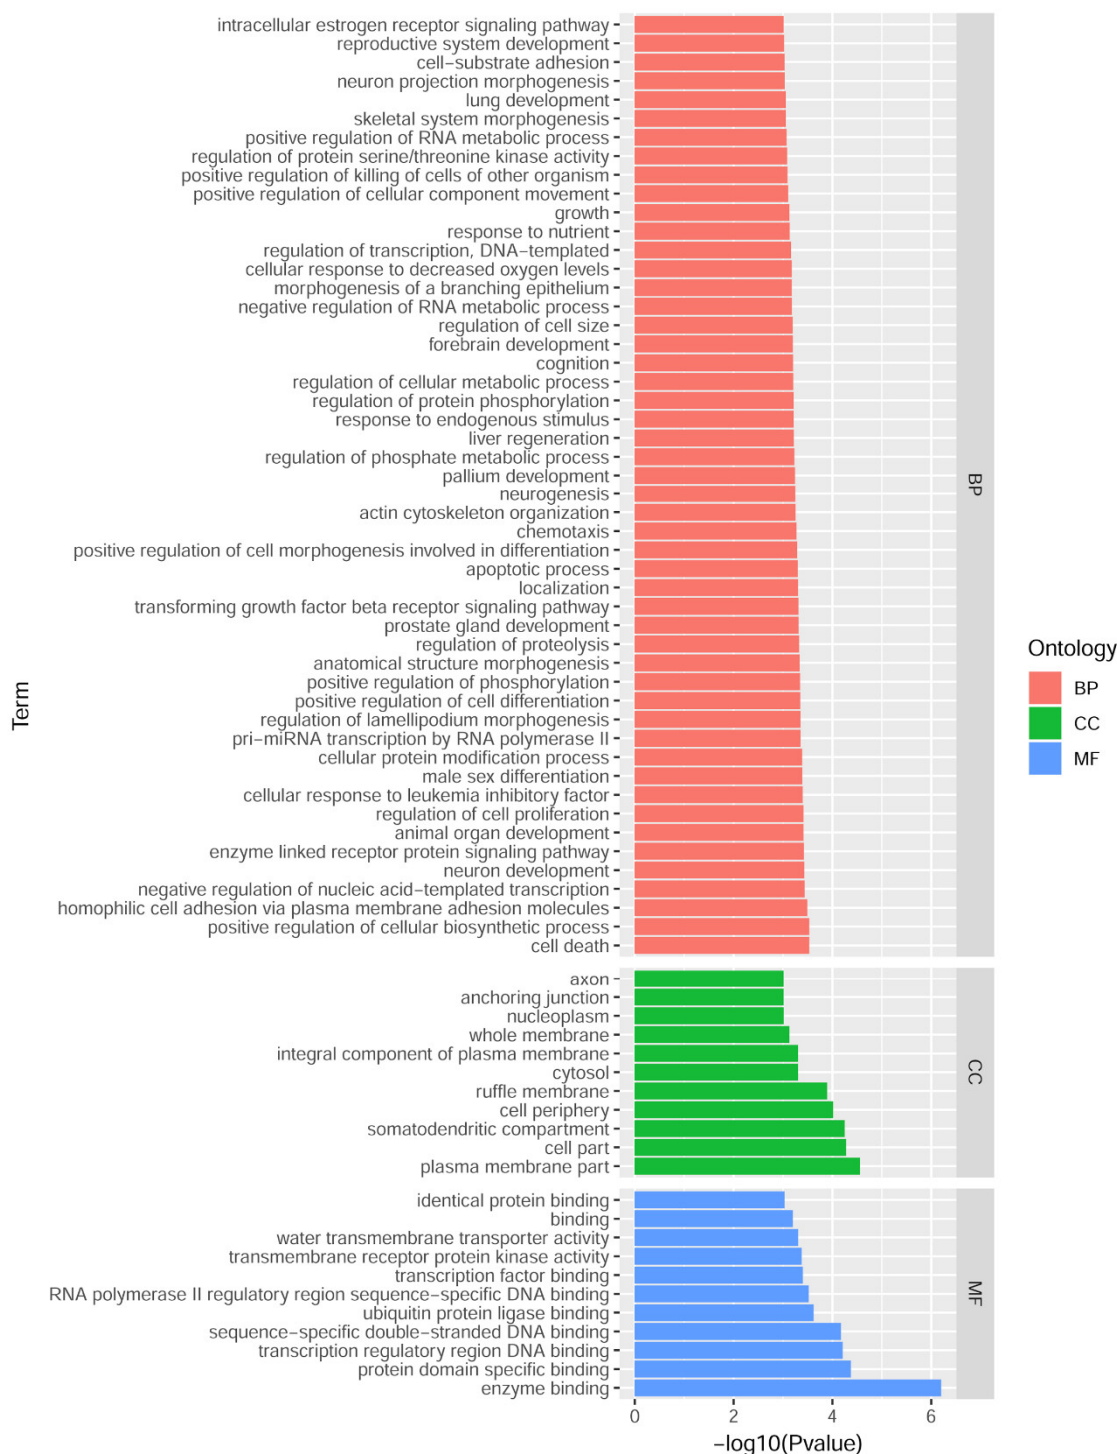

**Figure S3.** Functional enrichment analysis of miRNAs associated with tumor invasion and progression. Bar plot of statistically significant GO terms. The three GO categories are divided: BP (Biological process) in red, CC (Cellular component) in green, MF (Molecular function) in blue.

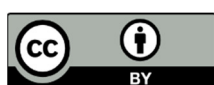

Supplement: cancers-11-00346-s001.pdf [file cancers-11-00346-s001.pdf]
